# Supplementary material for: Contact electrification through interfacial charge transfer: a mechanistic viewpoint on solid–liquid interfaces
Source: Royal Society of Chemistry journal article supplement (doi:10.1039/d1na00467k), 2021-12-17
Supplement: d1na00467k1.xlsx [file d1na00467k1.xlsx]

## Sheet: Adsorption Energies and workfun
Energies (eV)	Without VdW	Work Function	With VdW	Work Function
AlN
Cl	-3.148	6.0864	-2.91064	4.0939
H	-2.208	4.8314	-1.99933	2.9575
H2	-1.55	4.8991	-1.2991	3.6086
H2O	-1.692	6.1423	-1.5319	4.0428
HCl	-1.572	5.7004	-1.43833	3.9094
Na	-1.608	2.7433	-1.49543	1.0144
NaCl	-1.706	7.0933	-1.68781	2.1769
NaOH	-4.232	4.8972	-4.25406	1.3878
O	-1.282	5.7027	-0.639168	3.9883
OH	0.091	7.5163	0.256608	4.4212
GaN
Cl	-3.714	5.8252	-3.62317	5.8463
H	-2.476	4.8043	-2.19073	4.7831
H2	-2.155	4.8683	-1.82423	5.0664
H2O	-2.922	6.3032	-2.60714	6.6217
HCl	-2.148	5.5332	-1.93517	5.6836
Na	-2.452	2.8021	-2.38127	2.7354
NaCl	-4.773	5.1637	-4.70187	5.2722
NaOH	-2.421	7.108	-2.27782	7.1146
O	-2.047	5.9763	-1.84029	5.9732
OH	-0.432	5.8521	-0.285106	5.8729
Si
Cl	-7.923	4.8127	-6.75655	4.7635
H	-7.885	4.0579	-6.58737	3.9759
H2	-5.236	4.0804	-3.91239	4.0922
H2O	-7.262	4.9037	-5.64714	4.8934
HCl	-5.302	4.4574	-4.10231	4.4607
Na	-6.335	3.8987	-5.21114	3.7329
NaCl	-9.069	5.387	-6.97706	6.181
NaOH	-6.487	5.7942	-5.38275	5.7972
O	-13.39	4.5441	-7.39087	4.0581
OH	-4.702	5.1207	-3.48455	5.0695

## Sheet: Charge transfer
Without VdW	AlN	Gain/Loss	Totalgain/loss			GaN	Gain/Loss	Totalgain/loss			Si	Gain/Loss	Totalgain/loss
CL	7.80715	-0.80715	-0.80715		CL	7.63638	-0.636375	-0.636375		CL	7.58564	-0.585637	-0.585637
H	1.26566	-0.265659	-0.265659		H	1.23392	-0.233917	-0.233917		H	1.4101	-0.410095	-0.410095
H	0.974328	0.025672	0.000841		H	0.948727	0.051273	0.01072		H	1.00027	-0.000274	-0.001103
H	1.02483	-0.024831			H	1.04055	-0.040553			H	1.00083	-0.000829
O	7.27739	-1.27739	-0.032983		O	7.24519	-1.24519	-0.029962		O	7.21836	-1.21836	-0.026597
H	0.35584	0.64416			H	0.384234	0.615766			H	0.39079	0.60921
H	0.399755	0.600245			H	0.400541	0.615766			H	0.417445	0.582555
Cl	7.27863	-0.278634	-0.008393		Cl	7.25857	-0.258569	0.016332		Cl	7.31137	-0.311366	-0.04334
H	0.729759	0.270241			H	0.725099	0.274901			H	0.731974	0.268026
Na	8.72099	0.279007	0.279007		Na	8.15048	0.849517	0.849517		Na	8.15397	0.846027	0.846027
Na	8.17957	0.820429	0.042513		Na	8.11799	0.882007	0.125408		Na	8.13321	0.866788	0.034188
Cl	7.77792	-0.777916			Cl	7.7566	-0.756599			Cl	7.8326	-0.8326
Na	8.10894	0.891061	0.052022		Na	8.1323	0.867696	0.371587		Na	8.12858	0.871418	0.316271
O	7.42976	-1.42976			O	6.8802	-0.880203			O	6.93061	-0.930614
H	0.409283	0.590717			H	0.615906	0.384094			H	0.624533	0.375467
O	7.63074	-1.63074	-1.63074		O	7.17323	-1.17323	-1.17323		O	7.58687	-1.58687	-1.58687
O	6.83264	-0.832639	-0.311593		O	7.10106	-1.10106	-0.649708		O	7.00476	-1.00476	-0.556668
H	0.478954	0.521046			H	0.548648	0.451352			H	0.551913	0.448087
With VdW	AlN	Gain/Loss	Totalgain/loss			GaN	Gain/Loss	Totalgain/loss			Si	Gain/Loss	Totalgain/loss
CL	7.80006	-0.800057	-0.800057		CL	7.63795	-0.637946	-0.637946		CL	7.58503	-0.80715	-0.80715
H	1.26106	-0.261058	-0.261058		H	1.24095	-0.24095	-0.24095		H	1.41011	-0.265659	-0.265659
H	0.977224	0.022776	-0.004677		H	0.944813	0.055187	-0.0003		H	0.957013	0.025672	0.000841
H	1.02745	-0.027453			H	1.05549	-0.055487			H	1.05169	-0.024831
O	7.28317	-1.28317	-0.038197		O	7.22405	-1.22405	-0.037586		O	7.21616	-1.27739	-0.032983
H	0.353982	0.646018			H	0.423159	0.576841			H	0.384324	0.64416
H	0.401041	0.598959			H	0.390378	0.609622			H	0.427038	0.600245
Cl	7.28228	-0.282277	-0.021382		Cl	7.28618	-0.286183	-0.006025		Cl	7.31191	-0.278634	-0.008393
H	0.739105	0.260895			H	0.719842	0.280158			H	0.746716	0.270241
Na	8.67385	0.32615	0.32615		Na	8.15158	0.848421	0.848421		Na	8.15291	0.279007	0.279007
Na	8.18223	0.817775	0.036785		Na	8.12134	0.87866	0.124503		Na	8.15427	0.820429	0.042513
Cl	7.78099	-0.78099			Cl	7.75416	-0.754157			Cl	7.73866	-0.777916
Na	8.11846	0.881536	0.032536		Na	8.12767	0.872328	0.376409		Na	8.13702	0.891061	0.052022
O	7.40508	-1.40508			O	6.85871	-0.858706			O	6.9136	-1.42976
H	0.44392	0.55608			H	0.637213	0.362787			H	0.636608	0.590717
O	7.63357	-1.63357	-1.63357		O	7.17085	-1.17085	-1.17085		O	7.61156	-1.63074	-1.63074
O	6.78805	-0.788055	-0.316199		O	7.0944	-1.0944	-0.647183		O	6.96063	-0.832639	-0.311593
H	0.528144	0.471856			H	0.552782	0.447218			H	0.605717	0.521046
0K	AlN	Gain/Loss	Totalgain/loss			GaN	Gain/Loss	Totalgain/loss			Si	Gain/Loss	Totalgain/loss
CL	7.75969	-0.759693	-0.759693		CL	7.63366	-0.63366	-0.63366		CL	7.56398	-0.563976	-0.563976
H	1.33845	-0.338448	-0.338448		H	1.0928	-0.092804	-0.092804		H	1.49203	-0.492032	-0.492032
H	1.07455	-0.074551	-0.341506		H	1.11756	-0.117555	-0.27399		H	1.18186	-0.181855	-0.687156
H	1.26696	-0.266955			H	1.15644	-0.156435			H	1.5053	-0.505301
O	6.89823	-0.898229	-0.515251		O	6.60348	-0.60348	-0.248933		O	6.34586	-0.345861	-0.880784
H	0.472663	0.527337			H	0.605501	0.394499			H	1.49367	-0.493665
H	1.14436	-0.144359			H	1.03995	-0.039952			H	1.04126	-0.041258
Cl	7.26957	-0.269571	-0.003902		Cl	7.41667	-0.416669	-0.360754		Cl	7.28238	-0.282385	-0.002275
H	0.734331	0.265669			H	0.944085	0.055915			H	0.71989	0.28011
Na	8.7974	0.202603	0.202603		Na	8.13756	0.862444	0.862444		Na	8.1731	0.826903	0.826903
Na	8.17879	0.821213	0.042615		Na	8.14942	0.850577	0.212648		Na	8.16297	0.837029	0.079282
Cl	7.7786	-0.778598			Cl	7.63793	-0.637929			Cl	7.75775	-0.757747
Na	8.1749	0.825096	-0.103693		Na	8.12508	0.874916	0.464349		Na	8.16203	0.837967	0.335908
O	6.53499	-0.534991			O	6.31921	-0.319211			O	6.48138	-0.481376
H	1.3938	-0.393798			H	1.09136	-0.091356			H	1.02068	-0.020683
O	7.60601	-1.60601	-1.60601		O	6.54716	-0.54716	-0.54716		O	7.5752	-1.5752	-1.5752
O	6.82362	-0.823619	-0.828453		O	6.71227	-0.712265	-0.31605		O	7.48663	-1.48663	-1.92992
H	1.00483	-0.004834			H	0.603785	0.396215			H	1.44329	-0.443291
300K	AlN	Gain/Loss	Totalgain/loss			GaN	Gain/Loss	Totalgain/loss			Si	Gain/Loss	Totalgain/loss
CL	7.78652	-0.786519	-0.786519		CL	7.23117	-0.231169	-0.231169		CL	7.74823	-0.748232	-0.748232
H	1.39465	-0.394654	-0.394654		H	1.08299	-0.082991	-0.082991		H	1.4832	-0.483204	-0.483204
H	1.27223	-0.272231	-0.360373		H	1.08676	-0.08676	0.161143		H	1.09908	-0.09908	-0.287504
H	1.08814	-0.088142			H	0.752097	0.247903			H	1.18842	-0.188424
O	6.55954	-0.559542	-0.692616		O	6.37636	-0.376356	-0.301748		O	7.00344	-1.00344	-1.02325
H	1.06197	-0.061972			H	0.891567	0.108433			H	1.55274	-0.552737
H	1.0711	-0.071102			H	1.03382	-0.033825			H	0.467069	0.532931
Cl	7.29572	-0.295715	-0.007166		Cl	7.63718	-0.637178	-0.639523		Cl	7.2827	-0.282695	0.016867
H	0.711451	0.288549			H	1.00235	-0.002345			H	0.700438	0.299562
Na	8.92206	0.077935	0.077935		Na	8.26979	0.730213	0.730213		Na	8.19213	0.807874	0.807874
Na	8.16738	0.832617	0.037157		Na	8.14628	0.853716	0.273775		Na	8.15279	0.847205	0.023268
Cl	7.79546	-0.79546			Cl	7.57994	-0.579941			Cl	7.82394	-0.823937
Na	8.13525	0.864754	-0.089655		Na	8.12741	0.872593	0.142577		Na	8.16272	0.837278	0.220167
O	6.45784	-0.457842			O	6.34825	-0.348252			O	6.54188	-0.541875
H	1.49657	-0.496567			H	1.38176	-0.381764			H	1.07524	-0.075236
O	6.95802	-0.958022	-0.958022		O	6.54272	-0.542723	-0.542723		O	7.56905	-1.56905	-1.56905
O	6.89558	-0.895575	-0.701281		O	6.54113	-0.541126	-0.190067		O	7.33064	-1.33064	-0.730149
H	0.805706	0.194294			H	0.648941	0.351059			H	0.39951	0.60049

## Sheet: Surface charge density
	AlN	AlN	AlN	AlN	GaN	GaN	GaN	GaN	Si	Si	Si	Si
	Without VdW	VdW	0K	300K	Without VdW	VdW	0K	300K	Without VdW	VdW	0K	300K
Cl	-38.1396	-37.8045	-35.8972	-37.1648	-27.2139	-27.2811	-27.0978	-9.8857	-9.49578	-13.0875	-9.14456	-12.1322
H	-12.553	-12.3356	-15.9924	-18.6483	-10.0032	-10.304	-3.96867	-3.54902	-6.64946	-4.30751	-7.97803	-7.83489
H2	0.0397391	-0.220999	-16.1369	-17.0284	0.458429	-0.0128292	-11.7169	6.89111	-0.0178845	0.0136364	-11.1419	-4.66172
H2O	-1.55852	-1.80489	-24.3468	-32.7277	-1.28129	-1.60733	-10.6454	-12.9039	-0.431256	-0.534801	-14.2814	-16.5914
HCl	-0.396588	-1.01035	-0.184378	-0.33861	0.698421	-0.257653	-15.4273	-27.3485	-0.702734	-0.136088	-0.0368879	0.273489
Na	13.1837	15.4113	9.57345	3.6826	36.3287	36.2818	36.8815	31.2268	13.7179	4.52394	13.4078	13.0992
NaCl	2.00883	1.73817	2.01365	1.75575	5.36294	5.32424	9.09367	11.7077	0.55434	0.689325	1.28551	0.377278
NaOH	2.45816	1.5374	-4.89973	-4.2364	15.8905	16.0967	19.8574	6.09716	5.12816	0.843508	5.44656	3.56989
O	-77.0562	-77.1898	-75.8874	-45.2687	-50.1718	-50.0703	-23.3987	-23.209	-25.7302	-26.4416	-25.541	-25.4413
OH	-14.7235	-14.9411	-39.1463	-33.1371	-27.7841	-27.6761	-13.5155	-8.12801	-9.02606	-5.05231	-31.2926	-11.839

## Sheet: Complex Enegies at 0K and 300K
Total energy (eV)	0K	300K
AlN
Cl	-220.943	-219.813
H	-220.423	-219.059
H2	-219.983	-219.649
H2O	-227.152	-220.55
HCl	-225.475	-224.663
Na	-222.177	-221.32
NaCl	-225.712	-224.127
NaOH	-224.404	-226.075
O	-222.328	-223.526
OH	-221.597	-223.401
GaN
Cl	-167.392	-170.013
H	-165.33	-164.602
H2	-168.637	-170.01
H2O	-169.607	-166.444
HCl	-165.689	-169.399
Na	-171.066	-171.595
NaCl	-176.606	-174.443
NaOH	-174.368	-172.561
O	-169.028	-172.561
OH	-171.393	-170.88
Si
Cl	-151.037	-152.628
H	-152.99	-152.591
H2	-151.256	-148.091
H2O	-144.152	-159.121
HCl	-154.397	-156.673
Na	-153.111	-152.343
NaCl	-155.648	-155.937
NaOH	-152.209	-152.374
O	-156.841	-158.064
OH	-160.016	-161.489
