# Supplementary material for: Contact electrification through interfacial charge transfer: a mechanistic viewpoint on solid–liquid interfaces
Source: Royal Society of Chemistry journal article supplement (doi:10.1039/d1na00467k), 2021-12-17
Supplement: d1na00467k2.pdf [file d1na00467k2.pdf]

Supplementary file

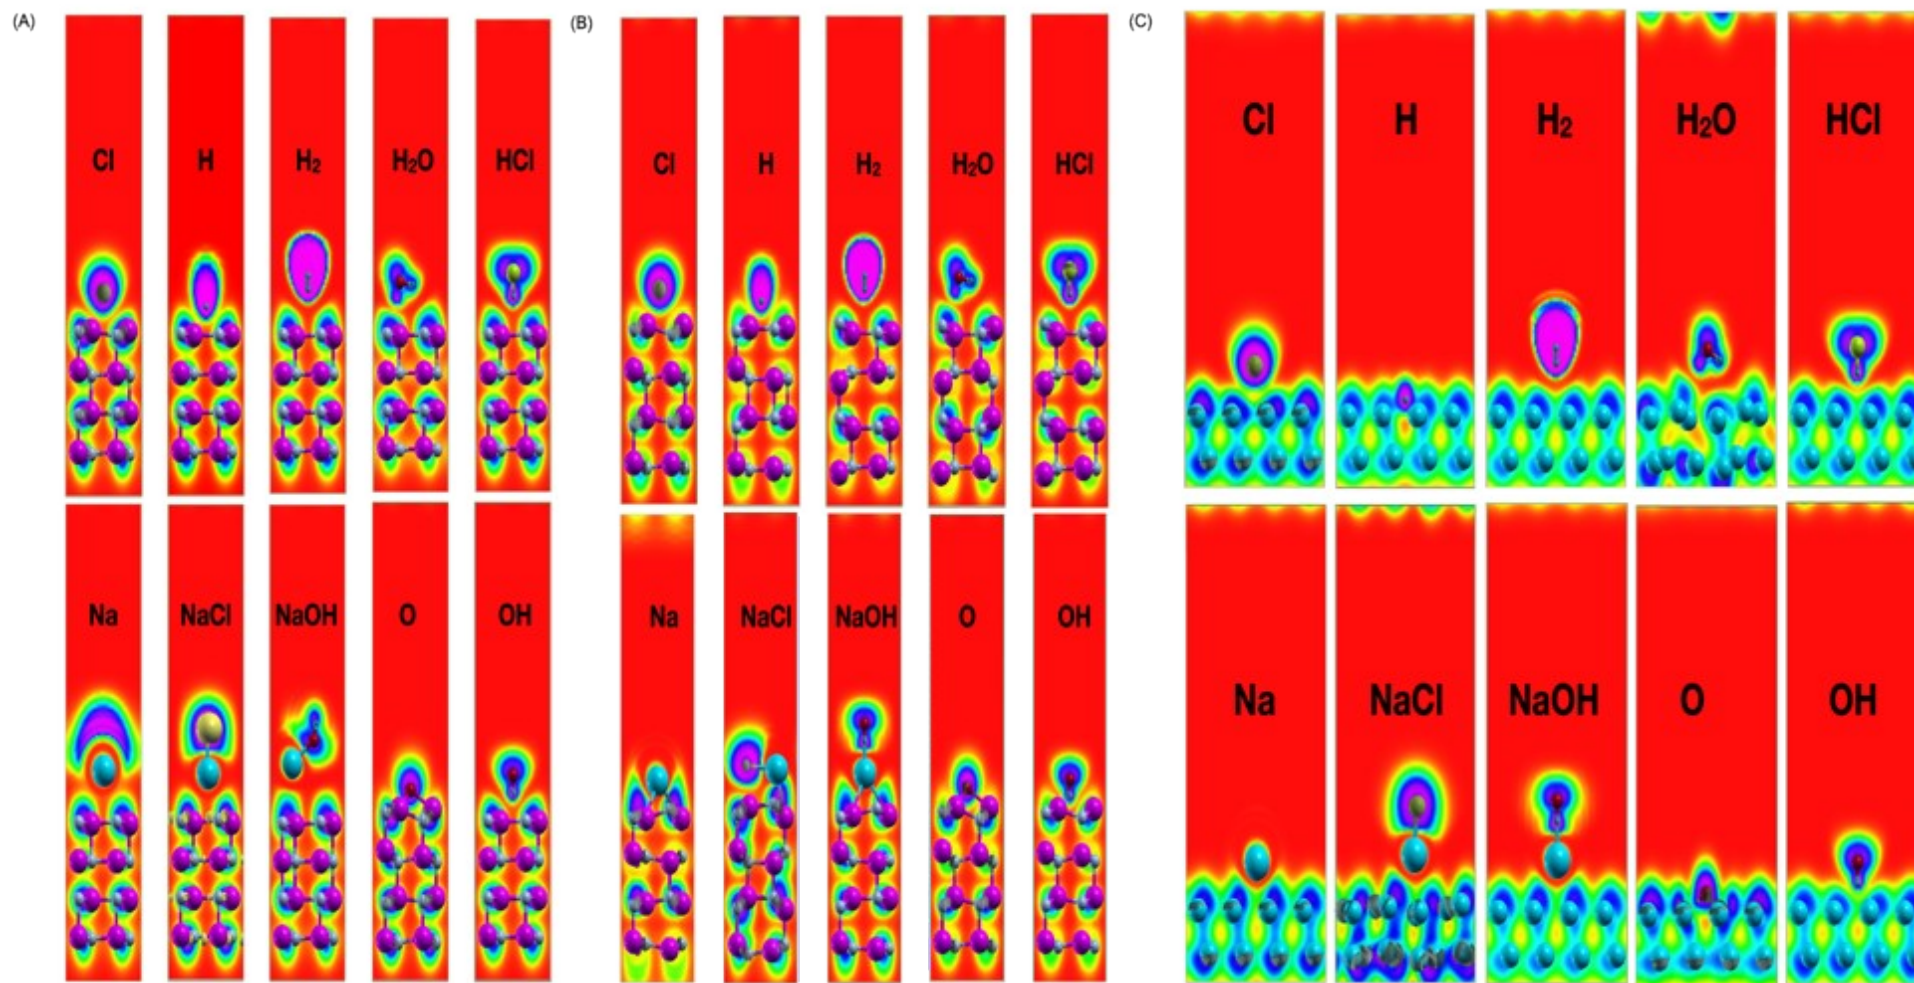

**Figure S1:** Electron localization function of the complex systems comprising of the molecules and ions adsorbed on different surfaces with VdW forces (A) on AlN surface (B) GaN surface (C) Si surface.

**AlN (001) surface**

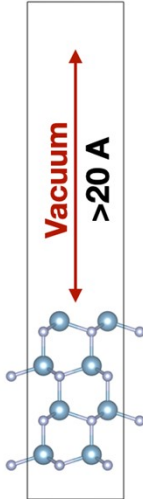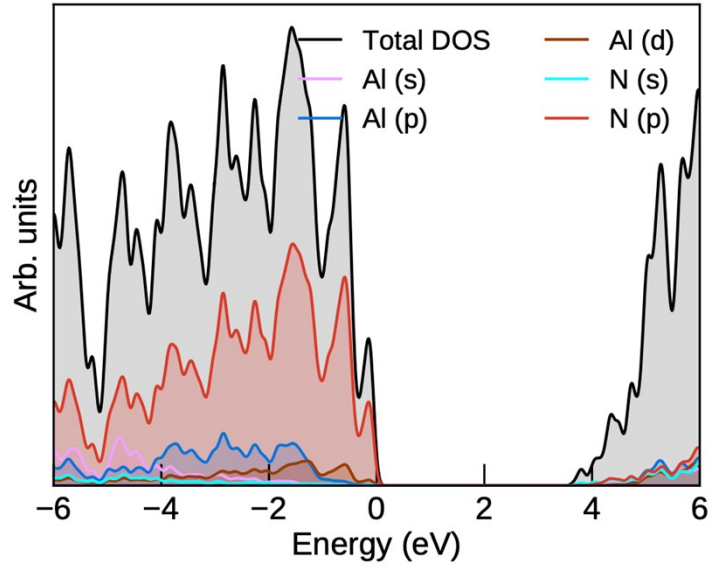

**GaN (001) surface**

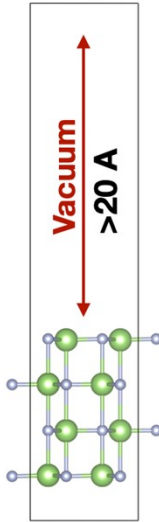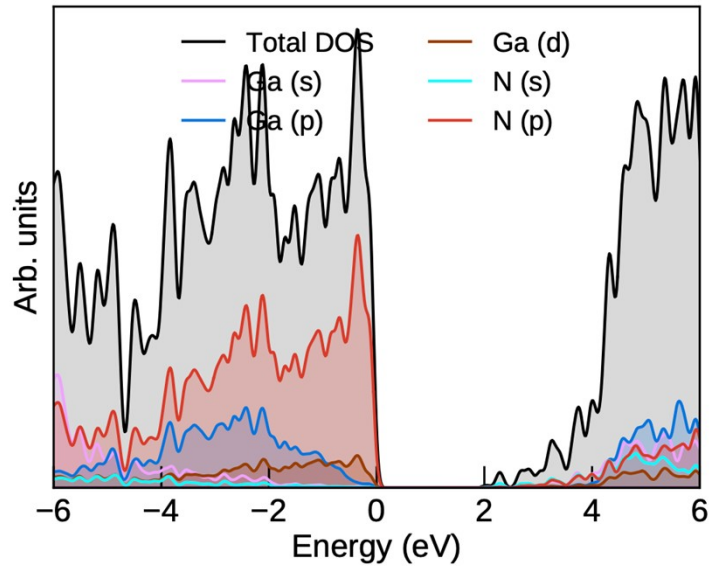

**Si (001) surface**

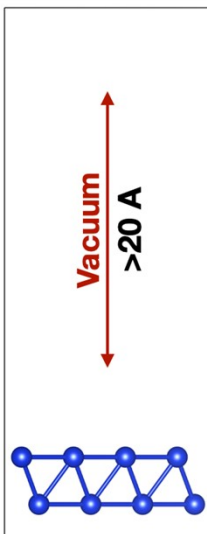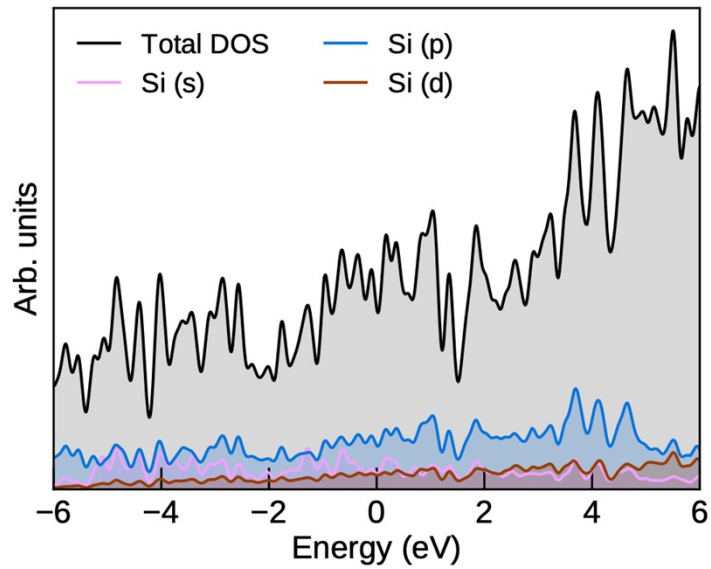

Figure S2: Projected Density of States of the pristine surfaces with VdW forces.

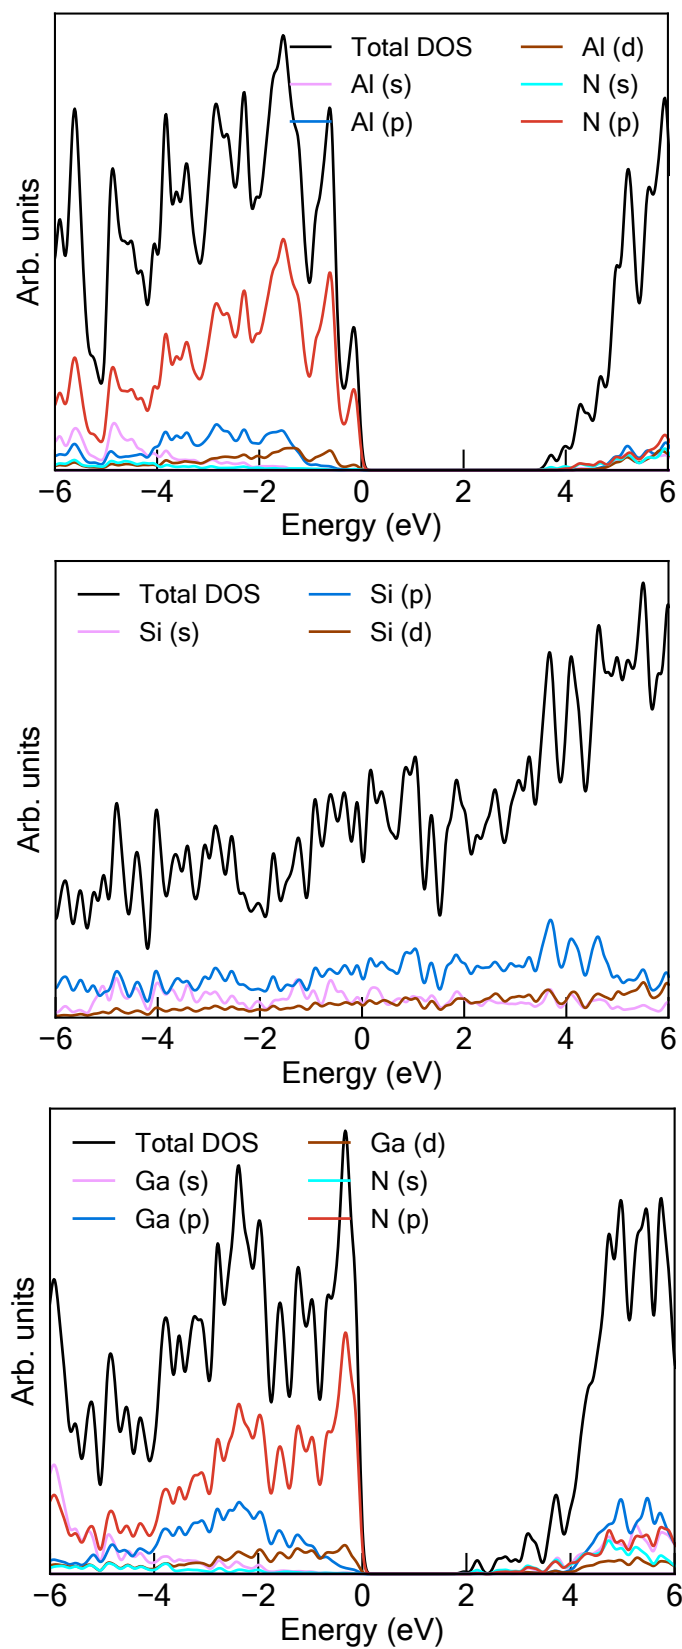

Figure S3: Projected Density of States of the pristine surfaces without VdW forces.
